1 **Effective population size and durability of plant resistances in the potato cyst nematode**

2 *Globodera pallida*

3

4 Josselin MONTARRY<sup>1,\*</sup>, Eric J. PETIT<sup>2</sup>, Sylvie BARDOU-VALETTE<sup>1,3</sup>, Romain MABON<sup>1</sup>,

5 Pierre-Loup JAN<sup>2</sup>, Sylvain FOURNET<sup>1</sup> and Eric GRENIER<sup>1</sup>

6

7 <sup>1</sup> INRA, UMR1349 IGEPP, Institute of Genetic Environment and Plant Protection, F35653 Le  
8 Rheu, France.

9 <sup>2</sup> INRA, Agrocampus-Ouest, UMR985 ESE, Ecology and Ecosystem Health, F35042 Rennes,  
10 France.

11 <sup>3</sup> present address: Université Clermont Auvergne, INRA, VetAgro, UMR1213 Herbivores,  
12 F63122 Saint-Genès-Champanelle, France.

13 \* Corresponding author: [josselin.montarry@inra.fr](mailto:josselin.montarry@inra.fr)

14

## 15 **Summary**

- 16
- 17 • The effective size of a population is the size of an ideal population which would drift at  
18 the same rate as the real population. The balance between selection and genetic drift  
19 depends on the population size expressed as the genetically effective population size  
( $N_e$ ), rather than the real numbers of individuals in the population ( $N$ ).
  - 20 • The objectives of the present study were to estimate  $N_e$  in the potato cyst nematode  
21 *Globodera pallida* using artificial populations and to explore the link between  $N_e$  and  
22 the durability of plant resistances.
  - 23 • Using a temporal method on 24 independent pairs of initial and final populations, the  
24 median  $N_e$  was 58 individuals.
  - 25 •  $N_e$  is commonly lower than  $N$  but in our case the  $N_e/N$  ratio was extremely low because  
26 *G. pallida* populations deviate in structure from the assumptions of the ideal population  
27 by having unequal sex-ratios, high levels of inbreeding and a high variance in family  
28 sizes. The consequences of a low  $N_e$  could be important for the control of phytoparasitic  
29 nematodes because *G. pallida* populations will have a low capacity to adapt to changing  
30 environments unless selection intensity is very strong, which could be greatly beneficial  
31 for long-term use of plant resistances.

32

## 33 **Keywords**

34 Census size, Durability, Effective population size, Genetic drift, *Globodera pallida*, Nematode,  
35 Plant resistance, Selection

36

37

## 38 **Introduction**

39 Mutation, migration, selection and genetic drift determine the evolution of populations, but  
40 genetic drift has a much greater impact and selection is less effective in small than in large  
41 populations (Frankham *et al.*, 2002). When both factors are operating, selection (deterministic)  
42 predominates in large populations, while genetic drift (stochastic) predominates in small  
43 populations (Kimura *et al.*, 1963; Nei *et al.*, 1975; Gherman *et al.*, 2007). Indeed, within small  
44 populations, the random sampling of gametes due to genetic drift leads to i) random changes in  
45 allele frequencies from one generation to the next, ii) loss of genetic diversity and fixation of  
46 alleles within populations, and consequently to iii) rapid diversification among fragmented  
47 populations from the same original source. The balance between selection and genetic drift  
48 depends on the population size expressed as the genetically effective population size ( $N_e$ ), rather  
49 than the real numbers of individuals in the population ( $N$ , the census size). The effective size  
50 of a population is the size of an ideal population which would drift at the same rate as the  
51 observed population (Wright, 1931). Thus, the  $N_e$  of a population is a measure of its genetic  
52 behaviour, relative to that of an ideal population, characterized by no migration, no mutation,  
53 no selection, no overlapping generations, equal sex-ratios, constant size in successive  
54 generations (i.e. on average one offspring per adult), random union of gametes, and a Poisson  
55 distribution of family sizes (Frankham *et al.*, 2002). Any characteristic of the real population  
56 that deviates from those characteristics of the ideal population will cause the effective size ( $N_e$ )  
57 to differ from the number of individuals in the population ( $N$ ).

58 Plant pathogens impose a major constraint on food production worldwide. They are  
59 often combated with pesticides, but the need to develop more sustainable production systems  
60 fuels a trend towards a limitation of pesticide applications. Among possible alternatives to  
61 chemical control, plant resistances look promising, but can only be used in the long term and  
62 accepted in the short term if their durability is ascertained. Durability of host resistance was  
63 defined as the persistence of resistance efficiency when resistant cultivars are used over long  
64 periods, on large surfaces and in the presence of the target pathogen (Johnson, 1981, 1984): it  
65 therefore depends primarily on the rhythm of adaptive changes affecting pathogen populations  
66 in response to selection by host resistance. The speed of fixation of an advantageous allele  
67 depends on the difference in its selection coefficient from that of the other alleles ( $\Delta S$ ) but also  
68 on the action of genetic drift, which is influenced by the effective population size ( $N_e$ ). The  
69 value of the product  $N_e * \Delta S$  determines whether the population will be mainly under the

70 influence of selection or of genetic drift (Crow & Kimura, 1970; Fraser, 1972; Charlesworth,  
71 2009). Consequently, the selection of virulent alleles (the virulence being defined as the ability  
72 to infect a resistant host – Vanderplank, 1963; Gandon & Michalakis, 2002; Tellier & Brown,  
73 2007, 2009) by resistant plants could be partly compromised by a low effective population size.

74 The effective size has been widely investigated both theoretically (Crow & Kimura,  
75 1972; Nei & Tajima, 1981; Tajima & Nei, 1984; Criscione & Blouin, 2005) and experimentally  
76 (Johnson *et al.*, 2004; Wang, 2005; Araki *et al.*, 2007) in a broad variety of organisms. For plant  
77 pathogens, the effective size is a very important point to take into account in order to manage  
78 plant resistances (e.g. Fabre *et al.*, 2012).  $N_e$ , and thus the importance of genetic drift, has been  
79 explored for several plant viruses (e.g. Betancourt *et al.*, 2008; Monsion *et al.*, 2008; Zwart *et*  
80 *al.*, 2011; Gutiérrez *et al.*, 2012; Fabre *et al.*, 2012, 2014) and fungi (e.g. Damgaard & Giese,  
81 1996; Zhan *et al.*, 2001; Duan *et al.*, 2010; Stukenbrock *et al.*, 2011). Regarding plant parasitic  
82 nematodes there is only one recent study exploring the  $N_e$  of the beet cyst nematode *Heterodera*  
83 *schachtii* from wild populations, sampled on *Beta maritima* (Jan *et al.*, 2016). The objectives  
84 of the present study were to estimate the  $N_e$  of the potato cyst nematode *Globodera pallida*, and  
85 to explore the link between  $N_e$  and the durability of plant resistances.

86 Several methods are dedicated to estimate effective population sizes (Wang, 2005;  
87 Palstra & Ruzzante, 2008; Luikart *et al.*, 2010). Methods using a single-sample estimate  $N_e$   
88 from the linkage disequilibrium and/or the heterozygote excess (Pudovkin *et al.*, 1996; Tallmon  
89 *et al.*, 2008; Waples & Do, 2008), whereas temporal methods estimate  $N_e$  from the variation of  
90 allelic frequencies between two temporally spaced samples. Deviations from Hardy-Weinberg  
91 equilibrium due to heterozygote deficits have been recorded for three plant parasitic nematode  
92 species (*Globodera pallida* - Picard *et al.*, 2004, *Heterodera schachtii* - Plantard & Porte, 2004,  
93 and *Globodera tabacum* - Alenda *et al.*, 2014) and recently attributed to both consanguinity and  
94 sub-structure at the plant scale (Montarry *et al.*, 2015). Those biological characteristics,  
95 inbreeding and sub-structure (Wahlund effect), are known to bias single-sample estimators of  
96  $N_e$  (Zdhanova & Pudovkin, 2008; Waples & Do, 2010; Holleley *et al.*, 2014). Therefore, we  
97 estimated  $N_e$  of *G. pallida* populations by using a temporal method developed by Wang (2001).

98 Rather than working with natural populations, which could sometimes harbor very low  
99 genetic diversity leading to infinite estimated  $N_e$ , we decided here to work with artificial

100 populations in order to maximize the allelic diversity in the initial populations and thus to better  
101 follow the variation of allelic frequencies between initial and final *G. pallida* populations.

102

## 103 **Materials and Methods**

### 104 **Biology of *Globodera pallida***

105 Nematodes are a group of worms that include free-living species such as *Caenorhabditis*  
106 *elegans* as well as many parasitic species of animals and plants. Plant-parasitic nematodes are  
107 major parasites that cause considerable economic losses in agriculture: worldwide crop losses  
108 caused by nematodes have been estimated around \$100 billion per year (Sasser & Freckman,  
109 1987). *Globodera pallida* is a gonochoristic diploid organism with obligatory sexual  
110 reproduction, which achieves one generation per year (Adams *et al.*, 1982). *G. pallida* is  
111 probably native to the Andean Cordillera (Grenier *et al.*, 2010), the origin of its unique host  
112 genus *Solanum* (Hijmans & Spooner, 2001). This obligate, sedentary endoparasite enters the  
113 plant roots as second-stage juveniles (J2) and establishes a specialized feeding structure, the  
114 syncytium (Jones & Northcote, 1972), which is a severe nutrient sink for the plant. Sex is  
115 environmentally determined through the size of the syncytium that is induced (Sobczak &  
116 Golinowski, 2011). Adult males leave the root in order to mate females. The females continue  
117 to feed and when egg development is completed, they die and form a cyst, enclosing hundreds  
118 of eggs, which constitute a survival stage that can stay viable for several years in soils.

119

### 120 **Initial nematode populations**

121 Twenty-four initial *G. pallida* populations, each composed of 100 cysts, were artificially made  
122 by mixing four Peruvian populations genetically differentiated and showing high allelic  
123 richness (Otuzco, Peru\_252, Peru\_286 and Peru\_298; Picard *et al.*, 2004). Before mixing those  
124 populations, the number of larvae was scored for 12 randomly chosen cysts, and a one-way  
125 ANOVA showed no significant difference for the number of larvae per cyst between those four  
126 populations ( $F_{3,44} = 1.59$ ;  $P = 0.21$ ; Fig. 1). The initial census size was thus estimated by  
127 multiplying the number of cysts (i.e. 100) by the mean number of larvae per cyst (i.e. 132, Fig.  
128 1).

129

[Figure 1 about here.]

130 We mixed different numbers of cysts from the different Peruvian populations to start  
131 with allelic frequencies that differ between initial populations. Each of seven different cyst  
132 proportions was replicated three times, apart from the equal mix, which was replicated six  
133 times, for a total of 24 initial populations (Table 1). Seven initial populations (Pi\_A to Pi\_G),  
134 composed of 50 cysts, were also prepared in the same proportions for the estimation of initial  
135 allelic frequencies.

136 [Table 1 about here.]

137

### 138 **Final nematode populations**

139 The 24 initial *G. pallida* populations were inoculated to 24 potato plants of the susceptible  
140 potato cultivar Désirée. Because Désirée is a susceptible cultivar, there is no *a priori* reason to  
141 expect directional selection in favour of an allele. Moreover, there is also no *a priori* reason to  
142 assume that any selection affecting the allelic frequencies is acting across plants (e.g. favouring  
143 an allele in a plant and selecting against it in another plant). We have thus assumed that selection  
144 is negligible.

145 For each initial population, the 100 cysts were locked in a tulle bag and placed in a 13-  
146 cm pot filled with a soil mixture free of cysts (2/3 sand and 1/3 natural field soil). Tubers were  
147 then planted and covered with the same soil mixture. Plants were grown during four months in  
148 a climatic chamber regulated at 20°C with a 16h photoperiod. During that period, the  
149 monovoltine species *G. pallida* achieved only one generation. Newly formed cysts from the 24  
150 final populations were then extracted from the soil using a Kort elutriator and stored at 4°C  
151 before genotyping. The number of newly formed cysts was counted for each final population  
152 and the number of larvae per cyst was scored for 12 randomly chosen cysts for seven final  
153 populations among the 24 (i.e. one randomly chosen population per initial proportion). The  
154 final census size was thus estimated by multiplying the mean number of cysts by the mean  
155 number of larvae per cyst.

156

### 157 **Microsatellite genotyping**

158 The 31 *G. pallida* populations (i.e. seven initial and 24 final populations) were genotyped using  
159 12 neutral microsatellite markers (Gp106, Gp108, Gp109, Gp111, Gp112, Gp116, Gp117,  
160 Gp118, Gp122, Gp126, Gp135 and Gp145) developed by Montarry *et al.* (2015) directly from  
161 the *G. pallida* genome (Cotton *et al.*, 2014). For each population, from 26 (for Pi\_E) to 40 (for  
162 Pi\_C) larvae, coming from distinct and randomly chosen cysts, were successfully genotyped.  
163 Two multiplex panels were used to reduce the time and cost required to genotype the 1,105  
164 individuals at the 12 loci.

165 DNA from single larva (i.e. one second-stage juvenile J2) was extracted following a  
166 procedure using sodium hydroxide and proteinase K (Boucher *et al.*, 2013). PCR was performed  
167 using a 384-well reaction module (BIO-RAD C1000) in a 5  $\mu$ L volume containing 1X of Type-  
168 it Microsatellite PCR kit, 0.4  $\mu$ M of primer mix and 1  $\mu$ L of template DNA. Cycling conditions  
169 included an initial denaturation at 95 °C for 5 min, followed by 30 cycles of denaturation at 95  
170 °C for 30 s, annealing at 57 °C for 90 s and extension at 72 °C for 30 s, followed by a final  
171 extension at 60 °C for 30 min. PCR products were then diluted to 1:25 in sterile water and 3  $\mu$ L  
172 of this dilution were mixed with 0.05  $\mu$ L of GeneScan 500 LIZ Size Standard (Applied  
173 Biosystems) and 5  $\mu$ L of formamide (Applied Biosystems). Analyses of PCR products were  
174 conducted on ABI Prism® 3130xl sequencer (Applied Biosystems). Allele sizes were  
175 determined by the automatic calling and binning module of GeneMapper v4.1 (Applied  
176 Biosystems) with manual examination of irregular results. To minimize the rate of genotyping  
177 errors, a second round of PCR and electrophoresis was performed for 10% of the global number  
178 of individuals.

179

## 180 **Population genetic characteristics**

181 Genetic diversity of each nematode population was estimated through allelic richness ( $A_r$ ) and  
182 unbiased gene diversity ( $H_{nb}$ ) (Nei, 1978). Departure from Hardy-Weinberg equilibrium was  
183 tested through the  $F_{IS}$  estimation for each population.  $H_{nb}$  and  $F_{IS}$  were computed using GENETIX  
184 4.05.2 (Belkhir *et al.*, 1996-2004). The statistical significance of  $F_{IS}$  values for each population  
185 was tested using the allelic permutation method (1,000 permutations) implemented in GENETIX.  
186  $A_r$  was estimated on a reduced sample of 26 individuals using the rarefaction method  
187 implemented in Populations 1.2.32 (Langella, 2000).

188           Because heterozygote deficits in cyst nematodes could be due to a Wahlund effect (i.e.  
189 sub-structure) and/or to consanguinity (Montarry *et al.*, 2015), we used the method of Overall  
190 and Nichols (2001) in order to calculate a likelihood surface for the genetic correlation due to  
191 population subdivision ( $\theta$ ) and the proportion of the population practicing consanguinity (C).  
192 The method, which is based on the argument that consanguinity and sub-structure generate  
193 distinctive patterns of homozygosity in multilocus data, was applied with a degree of  
194 relatedness of 1/4 (see Montarry *et al.*, 2015) to all initial and final populations showing  
195 significant heterozygote deficits. The most likely parameter combination was identified over a  
196 grid of 10,000 combinations of  $\theta$  and C values, and graphs of the likelihood surface were drawn  
197 for each nematode population using the statistical software R version 3.1.1 (R Core Team,  
198 2014).

199

#### 200 **Effective population size estimation**

201 The temporal method developed by Wang (2001) was used to estimate  $N_e$  from the 24  
202 independent pairs of initial and final populations of *G. pallida*. That likelihood-based method  
203 has been implemented in the MLNE 1.0 software (Wang & Whitlock, 2003).

204           The effect of initial populations, differing by the proportion of cysts coming from the  
205 different Peruvian populations, on  $N_e$  was tested using an ANOVA. Normality and  
206 homogeneity of variances were checked with the Shapiro-Wilk and the Levene tests,  
207 respectively, and mean values were compared with a Tukey test ( $\alpha = 0.05$ ). The correlation  
208 between the  $N_e$  estimates and the number of newly formed cysts in each final population was  
209 tested using the Pearson's correlation test. All statistical analyses were performed using R.

210

#### 211 **Exploring the link between $N_e$ and resistance durability**

212 The effective population size could be important for the control of plant pathogens because the  
213 effectiveness of selection is directly linked to the effective population size: selection is less  
214 effective in small than in large populations. Indeed, the probability of fixation of an allele in a  
215 population depends on its initial frequency, its selective advantage (or disadvantage) and the  
216 effective population size. Kimura (1962) showed that the probability of fixation of allele A is  
217 given by:



218 
$$P(A) = (1 - e^{-4.N_e.s.q}) / (1 - e^{-4.N_e.s})$$

219 where  $q$  is the initial frequency of allele  $A$ ,  $s$  the selection coefficient and  $N_e$  the effective  
220 population size. For a neutral allele, the fixation probability equals its frequency in the  
221 population (because genetic drift favours neither allele) but for advantageous alleles, the  
222 relationship between the fixation probability and the selection coefficient depends on the  
223 effective population size.

224 Fixing the initial frequency of allele  $A$  at 1% ( $q = 0.01$ ), the relationship between the  
225 fixation probability and the selection coefficient was explored for five  $N_e$  values, i.e. for the  
226 estimated  $N_e$  and for  $N_e$  two-, five-, 10- or 50-times higher.

227 Moreover, the selection coefficients exerted by four resistant potato genotypes were  
228 estimated using data from Fournet *et al.* (2013), who used these genotypes (96F.376.16,  
229 94T.146.52, 360.96.21 and 60.96.1) to perform an experimental evolution during eight *G.*  
230 *pallida* generations. The selection coefficient  $S$  was calculated using the univariate breeder's  
231 equation (Lush, 1937):  $R = h^2 * S$ , where  $R$  is the change in mean phenotype between two  
232 generations,  $h^2$  is the heritability, i.e. the proportion of phenotypic variance in the trait that is  
233 attributable to genetic effects. Making the assumption that the heritability of the measured trait  
234 (the number of produced females), which strongly covaries with fitness, is high, i.e.  $0.8 < h^2 <$   
235  $1$ , resulted in a range of values for  $S$  for each potato genotype.

236

## 237 **Results**

### 238 **Genetic characteristics of initial and final populations**

239 As expected, genetic diversity was high for all initial populations ( $0.64 < H_{nb} < 0.69$  and  $6.25$   
240  $< A_r < 7.34$ ; Table 2) and that diversity was conserved from one generation to the next, i.e. for  
241 the final populations ( $0.59 < H_{nb} < 0.70$  and  $5.54 < A_r < 7.14$ ; Table 2). All populations, except  
242 one (Pf\_05), showed a significant heterozygote deficit, with  $F_{IS}$  ranging from 0.32 to 0.43 for  
243 initial populations and from 0.05 to 0.22 for final populations (Table 2). Those heterozygote  
244 deficits were due to consanguinity and substructure for the seven initial populations (Table 2  
245 and Fig S1-A, Supporting Information) and only to consanguinity for the 23 final populations  
246 showing significant heterozygote deficits (Table 2 and Fig S1-B, Supporting Information).

247 [Table 2 about here.]

248

### 249 **Estimation of effective and census population sizes**

250  $N_e$  ranged from 25 to 228 individuals, the mean  $N_e$  being 86 individuals and the median  $N_e$   
251 being 58 individuals (Fig. 2).

252 [Figure 2 about here.]

253 There was a marginally significant effect of initial populations, differing by the  
254 proportion of cysts coming from the different Peruvian populations ( $F_{6,16} = 2.9$ ;  $P = 0.041$ ), but  
255 the comparison of means, performed with the Tukey test, was not able to identify distinct  
256 homogenous groups. Moreover, there was no significant correlation between mean  $N_e$   
257 (calculated for each pair of initial and final populations) and the number of cysts coming from  
258 each of the four Peruvian populations (data not shown).

259 The number of newly formed cysts ranged from 1,060 to 3,407 with a mean ( $\pm$ sem) of  
260 2,189 ( $\pm$ 116). There was no correlation between  $N_e$  estimates and the number of newly formed  
261 cysts (Pearson's coefficient  $cor = -0.18$ ;  $P = 0.41$ ). The number of larvae per cyst, scored for  
262 seven final populations, ranged from 196 to 288 with a mean ( $\pm$ sem) of 235 ( $\pm$ 12), and a one-  
263 way ANOVA showed no significant difference for the number of larvae per cyst between those  
264 seven final populations ( $F_{6,77} = 0.74$ ;  $P = 0.62$ ; Fig. 3). Consequently, our estimation of the final  
265 census size (N) was 514,415 larvae (2,189 newly formed cysts \* 235 larvae per cyst).

266 [Figure 3 about here.]

267

### 268 **Exploring the link between $N_e$ and resistance durability**

269 Fixing the initial frequency of an allele at 1%, results showed that for  $N_e = 58$ , the fixation  
270 probability was higher than 50% only for selection coefficients above 0.3, whereas for  $N_e$  two-  
271 , five-, 10- or 50-times higher, this threshold of 50% was crossed for lower selection coefficients  
272 (Fig. 4).

273 Using the breeder's equation, the estimation of the selection coefficients  $S$  exerted by  
274 the four resistant potato genotypes used by Fournet *et al.* (2013) showed that, for  $N_e = 58$ , the

275 fixation probability was small for the genotype 96F.376.16 ( $0.08 < S < 0.10$ ), medium for  
276 94T.146.52 ( $0.25 < S < 0.31$ ) and 360.96.21 ( $0.34 < S < 0.43$ ) and very high for 60.96.1 ( $0.78$   
277  $< S < 0.97$ ) (Fig. 4).

278 [Figure 4 about here.]

279

## 280 Discussion

281 This report evaluates the effective size of populations of *Globodera pallida*, the potato cyst  
282 nematode. Rather than working with natural populations, which could sometimes harbor very  
283 low genetic diversity leading to infinite estimated  $N_e$ , we decided here to work with artificial  
284 *G. pallida* populations. As expected, and because we have mixed four Peruvian populations  
285 that are genetically differentiated, heterozygote deficits observed for initial populations were  
286 very high (mean  $F_{IS} = 0.39$ ) and due to both consanguinity and sub-structure, whereas after one  
287 generation of mating, heterozygote deficits observed for final populations were lower (mean  
288  $F_{IS} = 0.13$ ) and only due to consanguinity, as in natural *G. pallida* populations (Montarry *et al.*,  
289 2015). Moreover, temporal methods assume neither migration nor selection and that the  
290 variation in allele frequencies between the samples is only due to genetic drift. Working with  
291 artificial population is thus a way to ensure the absence of migration, and allows to reduce the  
292 action of selection by using a susceptible potato cultivar. The requirement of an estimation of  
293 the generation number leads to difficulties in the evaluation of  $N_e$  for several species. For  
294 example, estimation of  $N_e$  during infection cycle of plant virus populations is quite complicated  
295 because of the lack of estimates of generation times for viruses (Fabre *et al.*, 2014). Regarding  
296 the beet cyst nematode *H. schachtii*, which is a plurivoltine species, Jan *et al.* (2016) have used  
297 two extreme estimations of the generation number. We have not that problem using the  
298 monovoltine species *G. pallida* because it performed only one generation over the experiment.

299 Using the likelihood-based method developed by Wang (2001), the median of the 24  $N_e$   
300 estimates was 58 individuals. The census size  $N$  of the initial populations was 13,200  
301 individuals (100 cysts \* 132 larvae per cyst) and our estimation of the census size of the final  
302 populations was 514,415 larvae (2,189 newly formed cysts \* 235 larvae per cyst). To obtain  
303 the  $N_e/N$  ratio, we computed the harmonic mean of these two values for  $N$  as recommended by  
304 Waples (2005), yielding  $\bar{N} = 25,740$ , and thus  $N_e/N \approx 2.10^{-3}$ . Based on a meta-analysis, values

305 of  $N_e/N$  average only 10-15% (Frankham, 1995; Palstra & Ruzzante, 2008). Thus, effective  
306 population sizes are substantially lower than census sizes. For example, the threatened winter  
307 run of chinook salmon in the Sacramento River of California has about 2,000 adults, but its  
308 effective size was estimated to be only 85 ( $N_e/N = 0.04$  - Bartley et al. 1992).  $N_e$  is thus  
309 commonly lower than  $N$  but in our case the  $N_e/N$  ratio is extremely low, close to values recorded  
310 in marine fishes (Hoarau *et al.*, 2005).

311 The effective size of a population is the size of an ideal population which would drift at  
312 the same rate as the observed population (Wright, 1931) and all characteristics that deviate  
313 between an ideal population and the real populations will cause the effective size ( $N_e$ ) to differ  
314 from the number of individuals in the population ( $N$ ). As mentioned above, some of those  
315 characteristics are similar between an ideal population and our nematode populations (i.e. no  
316 migration, no selection, no possibility for variation of  $N$  over generations and no overlapping  
317 generations) but others differ. Particularly, our real populations deviate in structure from the  
318 assumptions of the ideal population by having unequal sex-ratios and showing non random  
319 union of gametes. When larvae of different *G. pallida* populations were inoculated to  
320 susceptible potato roots in Petri dishes, the percentage of female produced was on average 60%  
321 (Fournet *et al.*, 2013). A meta-analysis showed that unequal sex-ratios have modest effects in  
322 reducing effective population sizes below actual sizes, resulting in an average reduction of 36%  
323 (Frankham, 1995). *G. pallida* populations are characterized by high levels of inbreeding,  
324 highlighted here for artificial populations (i.e.  $F_{IS}$  significantly higher than zero due to  
325 consanguinity) and previously highlighted for natural populations (Montarry *et al.*, 2015),  
326 which could also reduce effective population sizes (Charlesworth, 2009). While random mating  
327 generally sustains effective population sizes of pathogens (Barrett *et al.*, 2008), inbreeding  
328 increases the extent of genetic drift in pathogen populations, resulting in reduced  $N_e$  (Nunney  
329 & Luck, 1988). This factor on its own is however not able to explain the extremely low  $N_e/N$   
330 ratio we observe as inbreeding can reduce effective population size by 50% at most  
331 (Charlesworth, 2009). The census size of our initial and final nematode populations has  
332 increased from 13,200 to 514,415 individuals (i.e. multiplied by 39), indicating clearly that  
333 there were several offspring produced per adult. Whether all adults of the initial populations  
334 contributed equally to the final populations is however unlikely. It has been documented in cyst  
335 nematode species of the genus *Heterodera* that both males and females mate several times, with  
336 males contributing differently to the pool of larvae (Green *et al.*, 1970; Triantaphyllou &

337 Esbenshade, 1990). Patterns of mitochondrial gene diversity between larvae from the same cyst  
338 in a species in which mitochondrial DNA is biparentally transmitted (Hoolahan *et al.*, 2011)  
339 support the same mating pattern for *G. pallida* (J. Ferreira de Carvalho, S. Fournet & E. J. Petit,  
340 unpublished). Using our experimental data, we estimated the variance in family sizes to range  
341 between 130 and 2,100 (see Supplementary Table S1), suggesting indeed that some individuals  
342 do not contribute at all to the next generation (Hedrick, 2005). Because we estimated  $N_e$  and  $N$   
343 from one generation of J2 larvae to the next, these extreme figures combine both a low  
344 probability for each larvae to reach the adult stage, and a high variance in reproductive success  
345 for adults. The probability to reach adulthood can here be estimated from the ratio of twice the  
346 number of formed cysts (assuming a balanced sex-ratio) to the number of inoculated larvae,  
347 that is  $2 * 2,189 / 13,200 = 0.33$ , meaning that at least 1/3 of all individuals have zero breeding  
348 success. Taking into account this proportion of non-breeders is however far from being able to  
349 explain the low  $N_e/N$  on its own (see Eq. 5c in Hedrick, 2005). Ultimately, it is the combined  
350 impact of all these factors (i.e. extreme variance in family sizes, unequal sex-ratios, and  
351 inbreeding) which could explain that the  $N_e/N$  ratio is extremely low in *Globodera pallida*  
352 populations.

353         The low effective population size highlighted here for the potato cyst nematode *G.*  
354 *pallida* is consistent with estimations performed for wild populations of the beet cyst nematode  
355 *H. schachtii*:  $N_e$  around 85 individuals with a  $N_e/N$  ratio less than 1% (Jan *et al.*, 2016). Note  
356 that because the genetic of *G. pallida* populations deviates from that of an ideal population, the  
357 effective population size well describes the genetic drift intensity but estimates poorly the  
358 number of individuals that pass on their genes through generations. That explains why we  
359 obtained more females (2,189 newly formed cysts) than the estimated  $N_e$  (58 individuals). It  
360 however appears that the effective population size of phytoparasitic cyst nematodes is lower  
361 than  $N_e$  estimates of the free living nematode *Caenorhabditis elegans* (Barrière & Felix, 2005;  
362 Sivasundar & Hey, 2005; Cutter, 2006) and of animal parasitic nematodes (e.g. for  
363 *Trichostrongylus axei* – Archie & Ezenwa, 2011).

364         The consequences of a low  $N_e$  could be important for the control of phytoparasitic cyst  
365 nematodes. When  $N_e$  is large, competition between individuals is fully acting, with no or little  
366 interference of random processes, and selection shapes the genetic composition of populations.  
367 Conversely, in populations with a small  $N_e$ , genetic drift, resulting in stochastic sampling of  
368 individuals that will engender the next generation, is prevalent and counters the effect of

369 selection. Consequently, *G. pallida* populations will have a low capacity to adapt to changing  
370 environments unless selection intensity is very strong and that could be greatly beneficial for  
371 long-term use of plant resistances (McDonald & Linde, 2002). In this paper, for the first time,  
372 we were able to determine a selection pressure threshold that allows a better risk assessment  
373 and to demonstrate that durable resistance to cyst nematodes is a truly achievable goal. Indeed,  
374 for  $N_e = 58$ , our results showed that the fixation probability was small for the resistant potato  
375 genotype 96F.376.16, medium for 94T.146.52 and 360.96.21 and very high for 60.96.1,  
376 showing that resistance durability could be anticipated, and that the resistance of cultivars  
377 exerting a low selection pressure on pathogen population would be durable only for pathogens  
378 showing a low  $N_e$ . It is however important to consider that in natural field populations of *G.*  
379 *pallida*, genotype flow have been reported (Picard *et al.*, 2004), and those genotype flow could  
380 partly compensate the impact of genetic drift (Palstra & Ruzzante, 2008). In cyst nematode,  
381 genotype flow has mainly been attributed to the passive transport of cyst through agricultural  
382 practices (Alenda *et al.*, 2014). Therefore, all agricultural management strategies that reduce  
383 genotype flow and thus promote small effective population sizes would be beneficial for the  
384 durability of plant resistances.

385

## 386 **Acknowledgments**

387 We gratefully acknowledge Christophe Piriou for his technical help to count the number of  
388 cysts and the number of larvae per cyst. Drs. ML Pilet-Nayel and C Lavaud are acknowledged  
389 for useful discussions about the breeder's equation.

390

391 **References**

- 392 **Adams HH, Osborne WW, Webber AJ. 1982.** Effect of temperature on development and  
393 reproduction of *Globodera solanacearum*. *Nematropica* **12**: 305-311.
- 394 **Alenda, C, Montarry J, Grenier E. 2014.** Human influence on the dispersal and genetic  
395 structure of French *Globodera tabacum* populations. *Infection. Genetics and Evolution* **27**:  
396 309-317.
- 397 **Araki H., Waples RS, Blouin MS. 2007.** A potential bias in the temporal method for  
398 estimating  $N_e$  in admixed populations under natural selection. *Molecular Ecology* **16**: 2261-  
399 2271.
- 400 **Archie EA, Ezenwa VO. 2011.** Population genetic structure and history of a generalist parasite  
401 infecting multiple sympatric host species. *International Journal of Parasitology* **41**: 89–98.
- 402 **Barrett LG, Thrall PH, Burdon JJ, Linde CC. 2008.** Life history determines genetic  
403 structure and evolutionary potential of host–parasite interactions. *Trends in Ecology and*  
404 *Evolution* **23**: 678–685.
- 405 **Barrière A. Félix MA. 2005.** High local genetic diversity and low outcrossing rate in  
406 *Caenorhabditis elegans* natural populations. *Current Biology* **15**: 1176–1184.
- 407 **Bartley D, Bagley M, Gall G, Bentley B. 1992.** Use of linkage disequilibrium data to estimate  
408 effective size of hatchery and natural fish populations. *Conservation Biology* **6**: 365–375.
- 409 **Belkhir K, Borsa P, Chikhi L, Raufaste N, Bonhomme F. 1996-2004.** GENETIX 4.05,  
410 logiciel sous Windows TM pour la génétique des populations. Laboratoire Génome,  
411 Populations, Interactions, CNRS UMR 5000, Université de Montpellier II, Montpellier  
412 (France).
- 413 **Betancourt M, Fereres A, Fraile A, García-Arenal F. 2008.** Estimation of the effective  
414 number of founders that initiate an infection after aphid transmission of a multipartite plant  
415 virus. *Journal of Virology* **82**: 12416–12421.
- 416 **Boucher AC, Mimee B, Montarry J, Bardou-Valette S, Bélair G, Moffett P, Grenier E.**  
417 **2013.** Genetic diversity of the golden potato cyst nematode *Globodera rostochiensis* and  
418 determination of the origin of populations in Quebec, Canada. *Molecular Phylogenetics and*  
419 *Evolution* **69**: 75-82.
- 420 **Charlesworth B. 2009.** Effective population size and patterns of molecular evolution and  
421 variation. *Nature Reviews Genetics* **10**: 195-205.



- 422 **Cotton JA, Lilley CJ, Jones LM, Kikuchi T, Reid AJ, Thorpe P, Tsai IJ, Beasley H, Blok**  
423 **V, Cock PJA *et al.* 2014.** The genome and life-stage specific transcriptomes of *Globodera*  
424 *pallida* elucidate key aspects of plant parasitism by a cyst nematode. *Genome Biology* **15**:  
425 R43.
- 426 **Criscione CD, Blouin MS. 2005.** Effective sizes of macroparasite populations: a conceptual  
427 model. *Trends in Parasitology* **21**: 212-217.
- 428 **Crow JF, Kimura M. 1970.** *An introduction to population genetics theory*. New York, USA:  
429 Harper and Row.
- 430 **Crow JF, Kimura M. 1972.** The effective number of a population with overlapping  
431 generations: a correction and further discussion. *The American Journal of Human Genetics*  
432 **24**: 1-10.
- 433 **Cutter AD. 2006.** Nucleotide polymorphism and linkage disequilibrium in wild populations of  
434 the partial selfer *Caenorhabditis elegans*. *Genetics* **172**: 171–184.
- 435 **Damgaard C, Giese H. 1996.** Genetic variation in Danish populations of *Erysiphe graminis*  
436 f.sp. *hordei*: Estimation of gene diversity and effective population size using RFLP data.  
437 *Plant Pathology* **45**: 691-696.
- 438 **Duan X, Tellier A, Wan A, Leconte M, de Vallavielle-Pope C, Enjalbert J. 2010.** *Puccinia*  
439 *striiformis* f.sp. *tritici* presents high diversity and recombination in the over-summering zone  
440 of Gansu, China. *Mycologia* **102**: 44-53.
- 441 **Fabre F, Montarry J, Coville J, Senoussi R, Simon V, Moury B. 2012.** Modelling the  
442 evolutionary dynamics of viruses within their hosts: a case study using high-throughput  
443 sequencing. *PLoS Pathogens* **8**: e1002654.
- 444 **Fabre F, Moury B, Johansen EI, Simon V, Jacquemond M, Senoussi R. 2014.** Narrow  
445 bottlenecks affect *Pea seedborne mosaic virus* populations during vertical transmission but  
446 not during leaf colonization. *PLoS Pathogens*. **10**: e1003833.
- 447 **Fournet S, Kerlan MC, Renault L, Dantec JP, Rouaux C, Montarry J. 2013.** Selection of  
448 nematodes by resistant plants has implications for local adaptation and cross-virulence: local  
449 adaptation and cross-virulence in *Globodera pallida*. *Plant Pathology* **62**: 184–193.
- 450 **Frankham R. 1995.** Effective population size / adult population size ratios in wildlife: a  
451 review. *Genetics Research* **66**: 95–107.
- 452 **Frankham R, Ballou JD, Briscoe DA. 2002.** *Introduction to conservation genetics*.  
453 Cambridge, UK: Cambridge University Press.



- 454 **Fraser AS. 1972.** An introduction to population genetic theory. In: Crow JF, Kimura M, eds.  
455 *Teratology, Vol. 5.* New York, USA: Harper and Row, 386–387.
- 456 **Gandon S, Michalakis Y. 2002.** Local adaptation, evolutionary potential and host–parasite  
457 coevolution: interactions between migration, mutation, population size and generation time.  
458 *Journal of Evolutionary Biology* **15**: 451–462.
- 459 **Gherman A, Chen PE, Teslovich TM, Stankiewicz P, Withers M, Kashuk CS,**  
460 **Chakravarti A, Lupski JR, Cutler DJ, Katsanis N. 2007.** Population bottlenecks as a  
461 potential major shaping force of human genome architecture. *PLoS Genetics* **3**: 1223-1231.
- 462 **Green CD, Greet DN, Jones FGW. 1970.** The influence of multiple mating on the  
463 reproduction and genetics of *Heterodera rostochiensis* and *H. schachtii*. *Nematologica* **16**:  
464 309–326.
- 465 **Grenier E, Fournet S, Petit E, Anthoine G. 2010.** A cyst nematode 'species factory' called  
466 the Andes. *Nematology* **12**: 163-169.
- 467 **Gutiérrez S, Michalakis Y, Blanc S. 2012.** Virus population bottlenecks during within-host  
468 progression and host-to-host transmission. *Current Opinion in Virology* **2**: 1–10.
- 469 **Hedrick P. 2005.** Large variance in reproductive success and the  $Ne/N$  ratio. *Evolution* **59**:  
470 1596-1599.
- 471 **Hijmans RJ, Spooner DM. 2001.** Geographic distribution of wild potato species. *American*  
472 *Journal of Botany* **88**: 2101-2112.
- 473 **Hoarau G, Boon E, Jongma DN, Ferber S, Palsson J, der Veer HWV, Rijnsdorp AD, Stam**  
474 **WT, Olsen JL. 2005.** Low effective population size and evidence for inbreeding in an  
475 overexploited flatfish, plaice (*Pleuronectes platessa* L.). *Proceedings of the Royal Society*  
476 *of London B: Biological Sciences* **272**: 497–503.
- 477 **Holleley CE, Nichols RA, Whitehead MR, Adamack AT, Gunn MR, Sherwin WB. 2014.**  
478 Testing single-sample estimators of effective population size in genetically structured  
479 populations. *Conservation Genetics* **15**: 23–35.
- 480 **Hoolahan AH, Blok VC, Gibson T, Downton M. 2011.** Paternal leakage of mitochondrial DNA  
481 in experimental crosses of populations of the potato cyst nematode *Globodera pallida*.  
482 *Genetica* **139**: 1509–1519.
- 483 **Jan PL, Gracianne C, Fournet S, Olivier E, Arnaud JF, Porte C, Bardou-Valette S, Denis**  
484 **MC, Petit EJ. 2016.** Temporal sampling helps unravel the genetic structure of naturally  
485 occurring populations of a phytoparasitic nematode. 1 Insights from the estimation of  
486 effective population sizes. *Evolutionary Applications* **9**: 489-501.

- 487 **Johnson JA, Bellinger MR, Toepfer JE, Dunn P. 2004.** Temporal changes in allele  
488 frequencies and low effective population size in greater prairie-chickens. *Molecular Ecology*  
489 **13:** 2617-2630.
- 490 **Johnson R. 1981.** Durable resistance: definition of genetic control and attainment in plant  
491 breeding. *Phytopathology* **71:** 567-568.
- 492 **Johnson R. 1984.** A critical analysis of durable resistance. *Annual Review of Phytopathology*  
493 **22:** 309-330.
- 494 **Jones MGK, Northcote DH. 1972.** Nematode-induced syncytium - A multinucleate transfer  
495 cell. *Journal of Cell Science* **10:** 789-809.
- 496 **Kimura M. 1962.** On the probability of fixation of mutant genes in a population. *Genetics* **47:**  
497 713-719.
- 498 **Kimura M, Maruyama T, Crow JF. 1963.** The mutation load in small populations. *Genetics*  
499 **48:** 1303-1312.
- 500 **Langella O. 2000.** POPULATIONS 1·2: population genetic software, individuals or population  
501 distance, phylogenetic trees. <http://bioinformatics.org/~tryphon/populations>.
- 502 **Luikart G, Ryman N, Tallmon DA, Schwartz MK, Allendorf FW. 2010.** Estimation of  
503 census and effective population sizes: the increasing usefulness of DNA-based approaches.  
504 *Conservation Genetics* **11:** 355-373.
- 505 **Lush JL. 1937.** *Animal breeding plans*. Ames, IA, USA: Iowa State College Press.
- 506 **McDonald BA, Linde C. 2002.** Pathogen population genetics, evolutionary potential, and  
507 durable resistance. *Annual Review of Phytopathology* **40:** 349-379.
- 508 **Monsion B, Froissart R, Michalakis Y, Blanc S. 2008.** Large bottleneck size in *Cauliflower*  
509 *mosaic virus* populations during host plant colonization. *PLoS Pathogens* **4:** e1000174.
- 510 **Montarry J, Jan PL, Gracianne C, Overall ADJ, Bardou-Valette S, Olivier E, Fournet S,**  
511 **Grenier E, Petit EJ. 2015.** Heterozygote deficits in cyst plant-parasitic nematodes: possible  
512 causes and consequences. *Molecular Ecology* **24:** 1654-1667.
- 513 **Nei M. 1978.** Estimation of average heterozygosity and genetic distance from a small number  
514 of individuals. *Genetics* **89:** 583-590.
- 515 **Nei M, Tajima F. 1981.** Genetic drift and estimation of effective population size. *Genetics* **98:**  
516 625-640.
- 517 **Nei M, Maruyama T, Chakaraborty R. 1975.** The bottleneck effect and genetic variability in  
518 populations. *Evolution* **29:** 1-10.

- 519 **Nunney L, Luck RF. 1988.** Factors influencing the optimum sex ratio in a structured  
520 population. *Theoretical Population Biology* **33**: 1-30.
- 521 **Overall ADJ, Nichols RA. 2001.** A method for distinguishing consanguinity and population  
522 substructure using multilocus genotype data. *Molecular Biology and Evolution* **18**: 2048-  
523 2056.
- 524 **Palstra FP, Ruzzante DE. 2008.** Genetic estimates of contemporary effective population size:  
525 what can they tell us about the importance of genetic stochasticity for wild population  
526 persistence? *Molecular Ecology* **17**: 3428–3447.
- 527 **Picard D, Plantard O, Scurrah M, Mugniéry D. 2004.** Inbreeding and population structure  
528 of the potato cyst nematode (*Globodera pallida*) in its native area (Peru). *Molecular Ecology*  
529 **13**: 2899-2908.
- 530 **Plantard O, Porte C. 2004.** Population genetic structure of the sugar beet cyst nematode  
531 *Heterodera schachtii*: a gonochoristic and amphimictic species with highly inbred but  
532 weakly differentiated populations. *Molecular Ecology* **13**: 33-41.
- 533 **Pudovkin AI, Zaykin DV, Hedgecock D. 1996.** On the potential for estimating the effective  
534 number of breeders from heterozygote-excess in progeny. *Genetics* **144**: 383–387.
- 535 **R Core Team. 2014.** R: a language and environment for statistical computing. R Foundation  
536 for statistical computing, Vienna, Austria. <https://www.R-project.org>.
- 537 **Sasser JN, Freckman DW. 1987.** A world perspective on nematology: the role of the society.  
538 In: Veech JA, Dickson DW, eds. *Vistas on nematology*. Hyattsville, Maryland, USA:  
539 Society of Nematologists, 7-14.
- 540 **Sivasundar A, Hey J. 2005.** Sampling from natural populations with RNAi reveals high  
541 outcrossing and population structure in *Caenorhabditis elegans*. *Current Biology* **15**: 1598–  
542 1602.
- 543 **Sobczak M, Golinowski W. 2011.** Cyst nematodes and syncytia. In: Jones JT, Gheysen G,  
544 Fenoil C, eds. *Genomics and molecular genetics of plant-nematode interactions*. Dordrecht,  
545 The Netherlands: Springer, 61-82.
- 546 **Stukenbrock EH, Bataillon T, Dutheil JY, Hansen TT, Li R, Zala M, McDonald BA,  
547 Wang J, Schierup MH. 2011.** The making of a new pathogen: insights from comparative  
548 population genomics of the domesticated wheat pathogen *Mycosphaerella graminicola* and  
549 its wild sister species. *Genome Research* **21**: 2157–2166.
- 550 **Tajima F, Nei M. 1984.** Note on genetic drift and estimation of effective population size.  
551 *Genetics* **106**: 569-574.

- 552 **Tallmon DA, Koyuk A, Luikart G, Beaumont MA. 2008.** Onesamp: a program to estimate  
553 effective population size using approximate bayesian computation. *Molecular Ecology*  
554 *Resources* **8**: 299–301.
- 555 **Tellier A, Brown JKM. 2007.** Stability of genetic polymorphism in host-parasite interactions.  
556 *Proceedings of the Royal Society of London B: Biological Sciences* **274**: 809-817.
- 557 **Tellier A, Brown JKM. 2009.** The influence of perenniality and seed banks on polymorphism  
558 in plant-parasite interactions. *American Naturalist* **174**: 769-779.
- 559 **Triantaphyllou AC, Esbenshade PR. 1990.** Demonstration of multiple mating in *Heterodera*  
560 *glycines* with biochemical markers. *Journal of Nematology* **22**: 452–456.
- 561 **Vanderplank JE. 1963.** *Disease resistance in plants*. New York, USA: Academic Press.
- 562 **Wang J. 2001.** A pseudo-likelihood method for estimating effective population size from  
563 temporally spaced samples. *Genetics Research* **78**: 243–257.
- 564 **Wang J. 2005.** Estimation of effective population sizes from data on genetic markers.  
565 *Philosophical Transactions of the Royal Society of London B – Biological Sciences* **360**:  
566 1395-1409.
- 567 **Wang J, Whitlock MC. 2003.** Estimating effective population size and migration rates from  
568 genetic samples over space and time. *Genetics* **163**: 429–446.
- 569 **Waples RS. 2005.** Genetic estimates of contemporary effective population size: to what time  
570 periods do the estimates apply? *Molecular Ecology* **14**: 3335–3352.
- 571 **Waples RS, Do CHI. 2008.** LDNE: a program for estimating effective population size from  
572 data on linkage disequilibrium. *Molecular Ecology Resources* **8**: 753–756.
- 573 **Waples RS, Do CHI. 2010.** Linkage disequilibrium estimates of contemporary Ne using highly  
574 variable genetic markers: an untapped resource for applied conservation and evolution.  
575 *Evolutionary Applications* **3**: 244–262.
- 576 **Wright S. 1931.** Evolution in Mendelian populations. *Genetics* **16**: 97-159.
- 577 **Zhan J, Mundt CC, McDonald BA. 2001.** Using restriction fragment length polymorphisms  
578 to assess temporal variation and estimate the number of ascospores that initiate epidemics in  
579 field populations of *Mycosphaerella graminicola*. *Phytopathology* **91**: 1011-1017.
- 580 **Zhdanova OL, Pudovkin AI. 2008.** Nb\_HetEx: a program to estimate the effective number of  
581 breeders. *Journal of Heredity* **99**: 694–695.
- 582 **Zwart MP, Daròs JA, Elena SF. 2011.** One is enough: In vivo effective population size is  
583 dose-dependent for a plant RNA virus. *PLoS Pathogens* **7**: e1002122.
- 584

585 **Author contributions**

586 SBV, RM, and JM performed the experiments according to a protocol elaborated jointly by SF,  
587 EG and JM. PLJ, EJP and JM analyzed the data. SF, EJP, EG and JM wrote the text and  
588 prepared the figures. All authors edited the paper and have approved the current version.

589

590 **Data archival location**

591 All data used in this article are available at [datadryad.org](http://datadryad.org) (doi: to be completed).

592

593 **Figure Legends**

594

595 **Fig. 1** Number of larvae per cyst for the four *G. pallida* Peruvian populations (Otuzco,  
596 Peru\_252, Peru\_286 and Peru\_298). No significant difference was observed between those  
597 populations ( $F_{3,44} = 1.59$ ;  $P = 0.21$ ).

598

599 **Fig. 2** Histogram showing the distribution of the independent effective population sizes  
600 estimated using the Wang's method. The median  $N_e$  is indicated directly onto the box plot below  
601 the histogram.

602

603 **Fig. 3** Number of larvae per cyst for the seven final *G. pallida* populations. No significant  
604 difference was observed between those populations ( $F_{6,77} = 0.74$ ;  $P = 0.62$ ).

605

606 **Fig. 4** Probability of fixation of an allele ( $P(A)$ ), with an initial frequency of 1%, according to  
607 its selection coefficient ( $s$ ) for a diploid population showing an effective population size ( $N_e$ )  
608 of 58 individuals and for populations showing  $2N_e$  (116 individuals),  $5N_e$  (290 individuals),  
609  $10N_e$  (580 individuals) and  $50N_e$  (1,160 individuals). The dotted line indicates the probability  
610 of fixation of 50%. Credible intervals for selection coefficients are given as grey backgrounds  
611 for four different potato cultivars studied by Fournet et al. (2013). See text for more details.

612

613 **Supporting Information**

614 Additional supporting information may be found on the online version of this article.

615

616 **Fig. S1** Likelihood surfaces showing estimated  $\theta$  and C values with 95 and 99% confidence  
617 envelopes (internal and external envelopes of the highest likelihoods, visualized as grey shades,  
618 respectively) for **(A)** the seven initial *G. pallida* populations, **(B)** the 23 final *G. pallida*  
619 populations showing significant heterozygote deficits.  $\theta$  and C are represented on the x-axis  
620 and y-axis, respectively.

621 **Table S1** Estimation of the variance in family size ( $S^2_k$ ) from the effective population sizes ( $N_e$ )  
622 and proportions of inbred matings (C) estimated for each final population. The computation  
623 was not possible for Pf\_15 (no  $N_e$  estimate). The estimation was based on Caballero and Hill  
624 (1992, Eq. 10), with  $\alpha$  computed from C after Ghai (1969, Eq. 17), and  $N = 13,200$ , the census  
625 size of initial populations (see Text).

626

627 **Table 1** Number of cysts from each of the four Peruvian *G. pallida* populations (Otuzco,  
 628 Peru\_252, Peru\_286 and Peru\_298) used to construct the 24 initial populations (Pi\_01 to  
 629 Pi\_24). The estimation of the initial allelic frequencies was performed through the genotyping  
 630 of the seven initial populations (Pi\_A to Pi\_G) composed of 50 cysts mixed using the same  
 631 proportions.

| <b>Genotyped population</b> | <b>Initial population</b> | <b>Otuzco</b> | <b>Peru_252</b> | <b>Peru_286</b> | <b>Peru_298</b> |
|-----------------------------|---------------------------|---------------|-----------------|-----------------|-----------------|
| <b>Pi_A</b>                 | <b>Pi_01</b>              | 20            | 30              | 20              | 30              |
|                             | <b>Pi_02</b>              | 20            | 30              | 20              | 30              |
|                             | <b>Pi_03</b>              | 20            | 30              | 20              | 30              |
| <b>Pi_B</b>                 | <b>Pi_04</b>              | 30            | 30              | 20              | 20              |
|                             | <b>Pi_05</b>              | 30            | 30              | 20              | 20              |
|                             | <b>Pi_06</b>              | 30            | 30              | 20              | 20              |
| <b>Pi_C</b>                 | <b>Pi_07</b>              | 20            | 30              | 30              | 20              |
|                             | <b>Pi_08</b>              | 20            | 30              | 30              | 20              |
|                             | <b>Pi_09</b>              | 20            | 30              | 30              | 20              |
| <b>Pi_D</b>                 | <b>Pi_10</b>              | 30            | 20              | 20              | 30              |
|                             | <b>Pi_11</b>              | 30            | 20              | 20              | 30              |
|                             | <b>Pi_12</b>              | 30            | 20              | 20              | 30              |
| <b>Pi_E</b>                 | <b>Pi_13</b>              | 20            | 20              | 30              | 30              |
|                             | <b>Pi_14</b>              | 20            | 20              | 30              | 30              |
|                             | <b>Pi_15</b>              | 20            | 20              | 30              | 30              |
| <b>Pi_F</b>                 | <b>Pi_16</b>              | 30            | 20              | 30              | 20              |
|                             | <b>Pi_17</b>              | 30            | 20              | 30              | 20              |
|                             | <b>Pi_18</b>              | 30            | 20              | 30              | 20              |
| <b>Pi_G</b>                 | <b>Pi_19</b>              | 25            | 25              | 25              | 25              |
|                             | <b>Pi_20</b>              | 25            | 25              | 25              | 25              |
|                             | <b>Pi_21</b>              | 25            | 25              | 25              | 25              |
|                             | <b>Pi_22</b>              | 25            | 25              | 25              | 25              |
|                             | <b>Pi_23</b>              | 25            | 25              | 25              | 25              |
|                             | <b>Pi_24</b>              | 25            | 25              | 25              | 25              |

632

633



634 **Table 2** Number of cysts (cysts), number of genotyped individuals (n), genetic diversity ( $H_{nb}$   
 635 and  $A_r$ ) and departure from Hardy-Weinberg equilibrium ( $F_{IS}$ ) for each *G. pallida* population  
 636 (i.e. seven artificial initial populations and 24 final populations).  $F_{IS}$  values significantly  
 637 different to zero are indicated in bold. For each population showing a significant heterozygote  
 638 deficit,  $\theta$  and C values corresponding to the maximum-likelihood were indicated.

| Population                 | cysts | n  | $H_{nb}$ | $A_r$ | $F_{IS}$    | $\theta$ | C    |
|----------------------------|-------|----|----------|-------|-------------|----------|------|
| <b>Initial populations</b> |       |    |          |       |             |          |      |
| Pi_A                       | 100   | 39 | 0.68     | 7.23  | <b>0.37</b> | 0.31     | 0.13 |
| Pi_B                       | 100   | 38 | 0.68     | 7.23  | <b>0.41</b> | 0.35     | 0.23 |
| Pi_C                       | 100   | 40 | 0.65     | 7.34  | <b>0.32</b> | 0.25     | 0.24 |
| Pi_D                       | 100   | 39 | 0.64     | 6.25  | <b>0.43</b> | 0.38     | 0.28 |
| Pi_E                       | 100   | 26 | 0.65     | 6.57  | <b>0.37</b> | 0.23     | 0.60 |
| Pi_F                       | 100   | 38 | 0.69     | 7.30  | <b>0.39</b> | 0.25     | 0.60 |
| Pi_G                       | 100   | 36 | 0.68     | 6.90  | <b>0.43</b> | 0.26     | 0.85 |
| <b>Final populations</b>   |       |    |          |       |             |          |      |
| Pf_01                      | 2704  | 28 | 0.65     | 7.00  | <b>0.14</b> | 0.00     | 0.52 |
| Pf_02                      | 3407  | 33 | 0.66     | 6.51  | <b>0.14</b> | 0.00     | 0.45 |
| Pf_03                      | 3136  | 38 | 0.68     | 6.31  | <b>0.16</b> | 0.00     | 0.54 |
| Pf_04                      | 2227  | 36 | 0.59     | 6.35  | <b>0.11</b> | 0.03     | 0.35 |
| Pf_05                      | 2541  | 34 | 0.60     | 5.54  | -0.01       | .        | .    |
| Pf_06                      | 2082  | 36 | 0.62     | 6.24  | <b>0.13</b> | 0.00     | 0.48 |
| Pf_07                      | 2053  | 37 | 0.67     | 7.14  | <b>0.10</b> | 0.02     | 0.38 |
| Pf_08                      | 2511  | 38 | 0.70     | 6.87  | <b>0.17</b> | 0.00     | 0.56 |
| Pf_09                      | 1459  | 32 | 0.65     | 6.59  | <b>0.12</b> | 0.00     | 0.46 |
| Pf_10                      | 2193  | 34 | 0.66     | 6.78  | <b>0.18</b> | 0.02     | 0.59 |
| Pf_11                      | 2425  | 37 | 0.63     | 6.27  | <b>0.05</b> | 0.00     | 0.25 |
| Pf_12                      | 1749  | 39 | 0.64     | 6.40  | <b>0.22</b> | 0.05     | 0.57 |
| Pf_13                      | 2893  | 33 | 0.63     | 6.29  | <b>0.05</b> | 0.00     | 0.18 |
| Pf_14                      | 1391  | 36 | 0.61     | 6.45  | <b>0.13</b> | 0.00     | 0.49 |
| Pf_15                      | 1060  | 35 | 0.68     | 6.77  | <b>0.07</b> | 0.00     | 0.26 |
| Pf_16                      | 2613  | 36 | 0.60     | 6.00  | <b>0.18</b> | 0.00     | 0.56 |

|       |      |    |      |      |             |      |      |
|-------|------|----|------|------|-------------|------|------|
| Pf_17 | 2161 | 36 | 0.60 | 5.93 | <b>0.16</b> | 0.00 | 0.50 |
| Pf_18 | 1641 | 39 | 0.63 | 6.82 | <b>0.22</b> | 0.07 | 0.63 |
| Pf_19 | 2776 | 34 | 0.60 | 6.37 | <b>0.17</b> | 0.06 | 0.46 |
| Pf_20 | 2117 | 37 | 0.65 | 6.73 | <b>0.13</b> | 0.00 | 0.46 |
| Pf_21 | 1753 | 35 | 0.61 | 6.19 | <b>0.08</b> | 0.00 | 0.31 |
| Pf_22 | 1815 | 34 | 0.62 | 6.53 | <b>0.21</b> | 0.02 | 0.75 |
| Pf_23 | 2056 | 36 | 0.61 | 6.69 | <b>0.18</b> | 0.01 | 0.61 |
| Pf_24 | 1779 | 36 | 0.64 | 6.81 | <b>0.11</b> | 0.03 | 0.33 |

---

639

640

641 **Figure 1 – Montarry et al.**

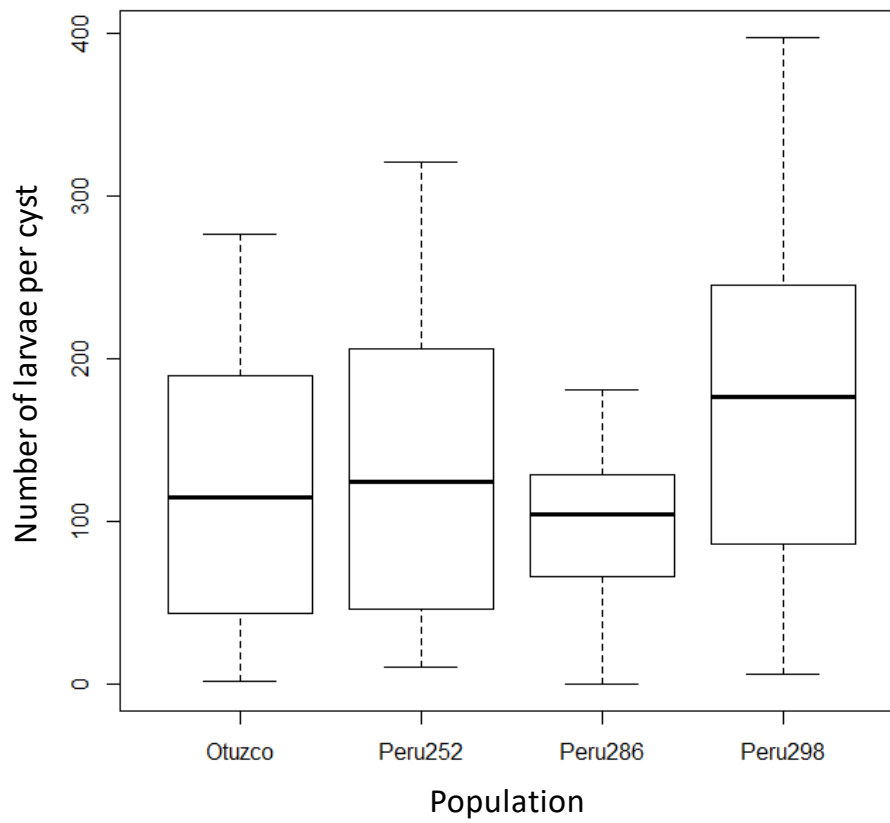

642

643

644 **Figure 2 – Montarry et al.**

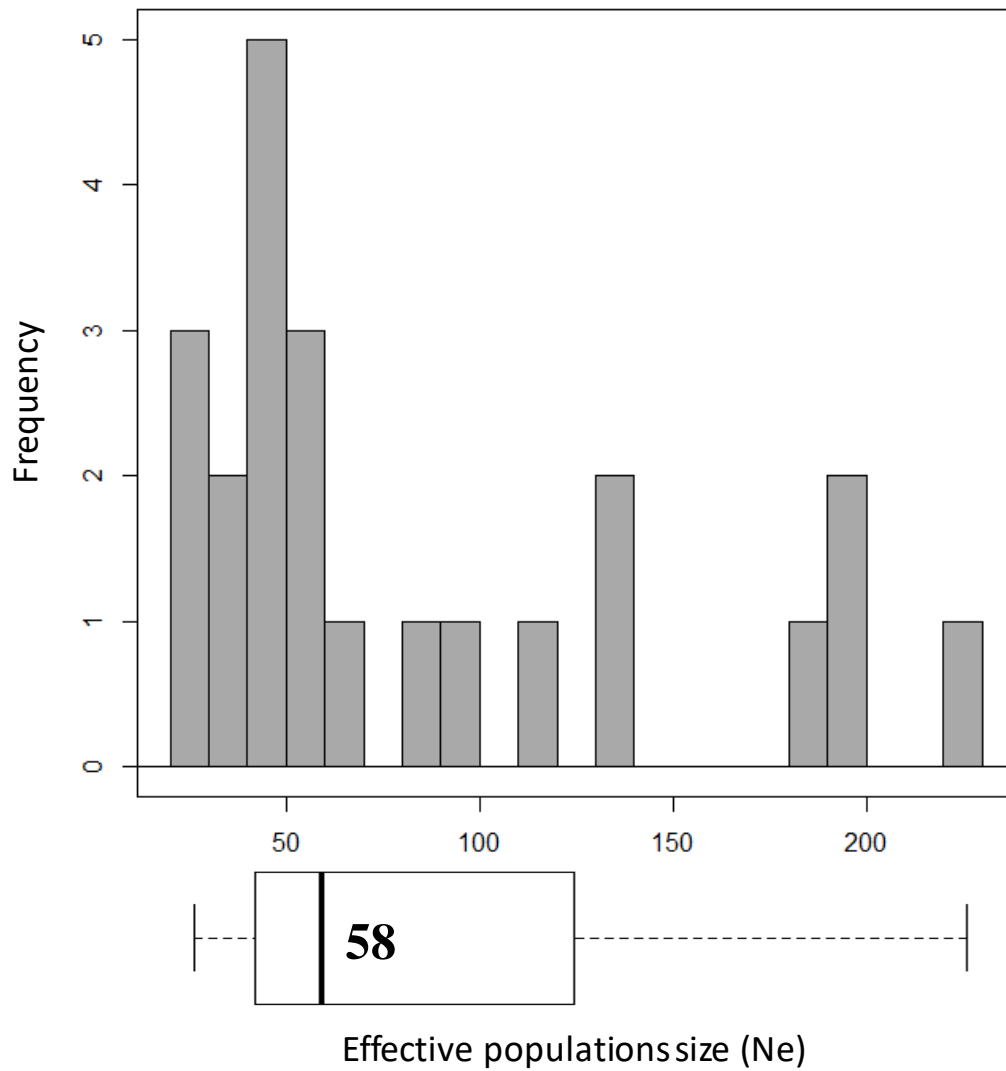

645

646

647

648 **Figure 3 – Montarry et al.**

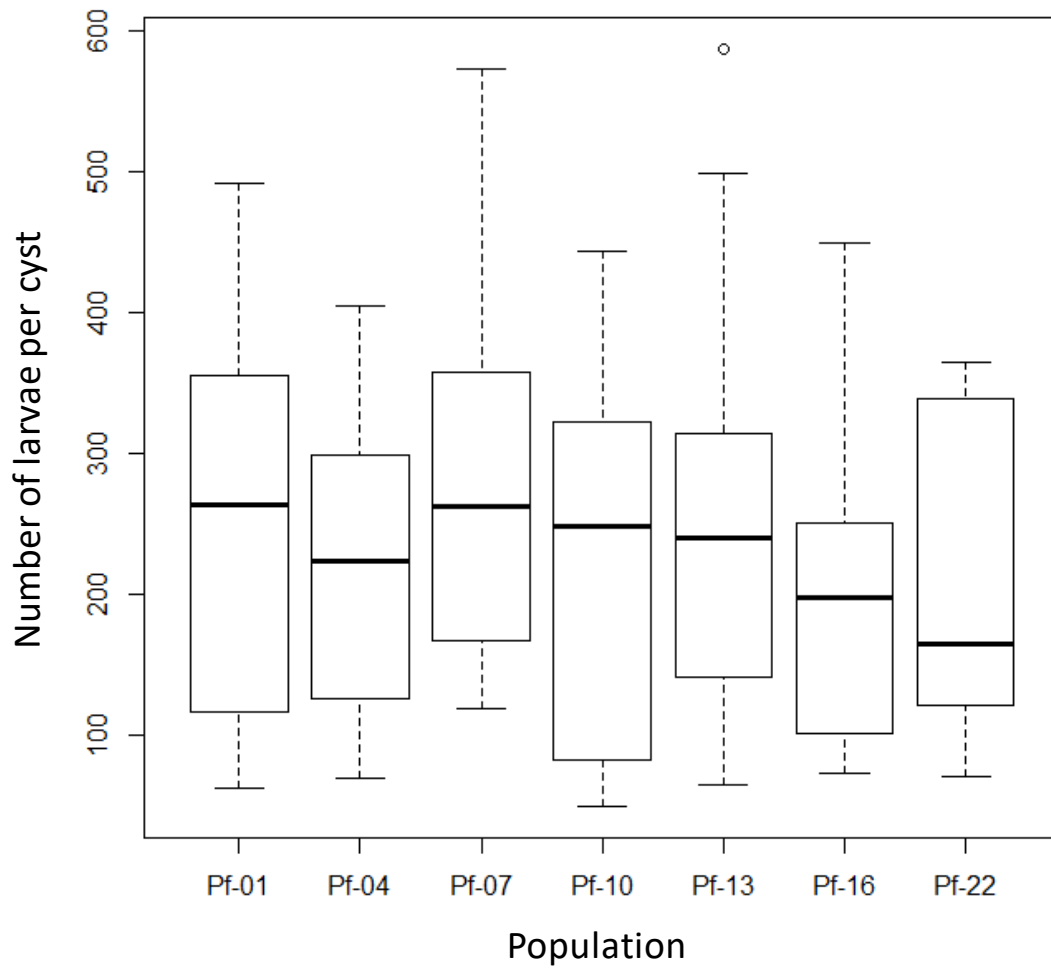

649

650

651 **Figure 4 – Montarry et al.**

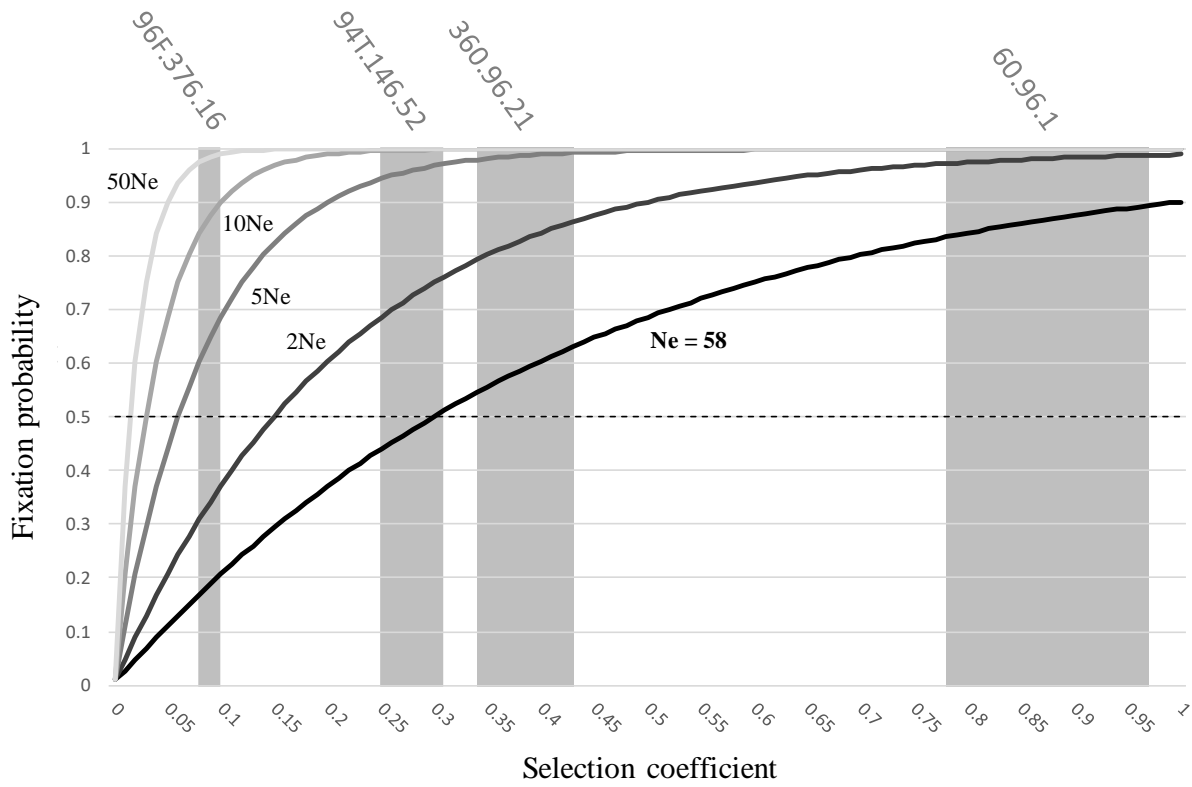

652

653

654 **Supporting information \_ Montarry et al.**

655 **Fig. S1:** Likelihood surfaces showing estimated  $\vartheta$  and C values with 95 and 99% confidence envelopes (internal and external envelopes of the  
656 highest likelihoods, visualized as grey shades, respectively) for **(A)** the seven initial *G. pallida* populations, **(B)** the 23 final *G. pallida* populations  
657 showing significant heterozygote deficits.  $\vartheta$  and C are represented on the x-axis and y-axis, respectively.

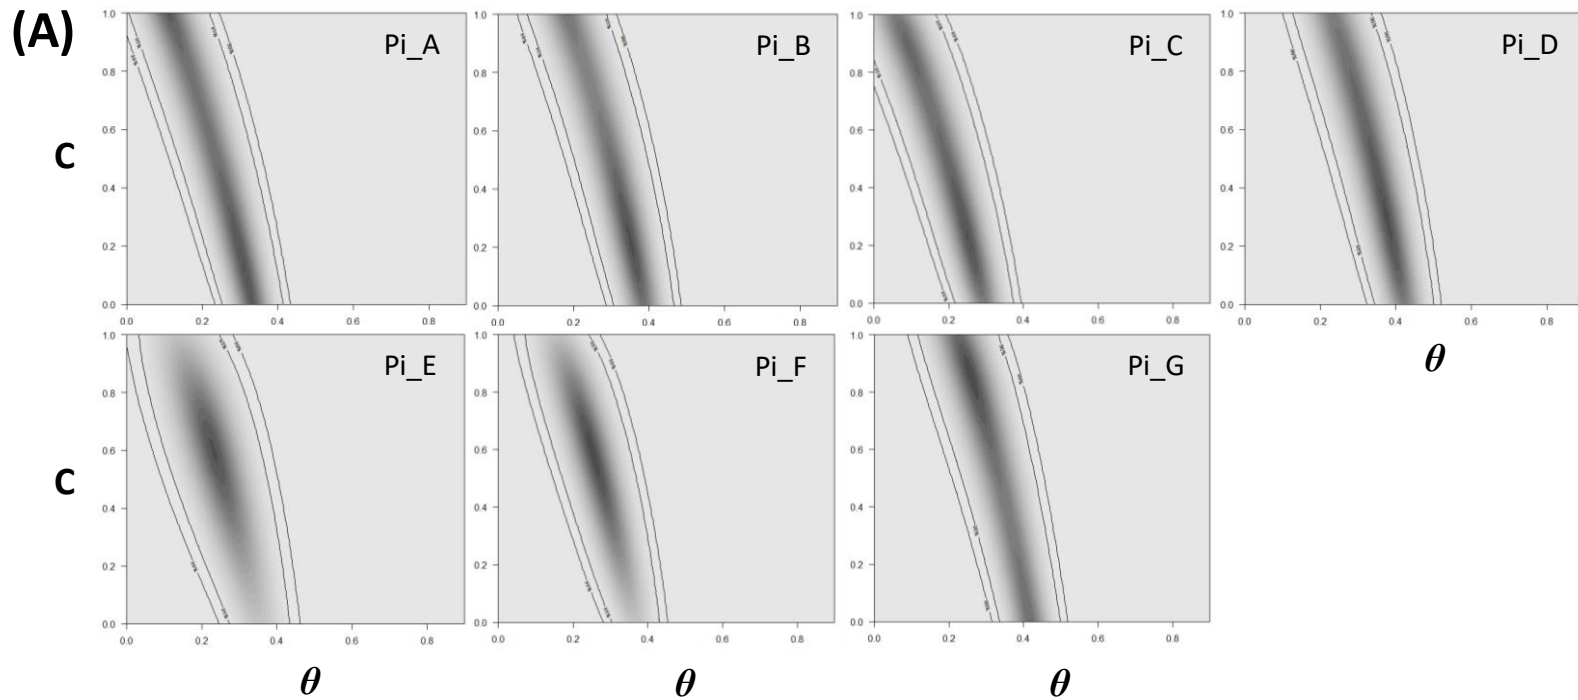

658

659

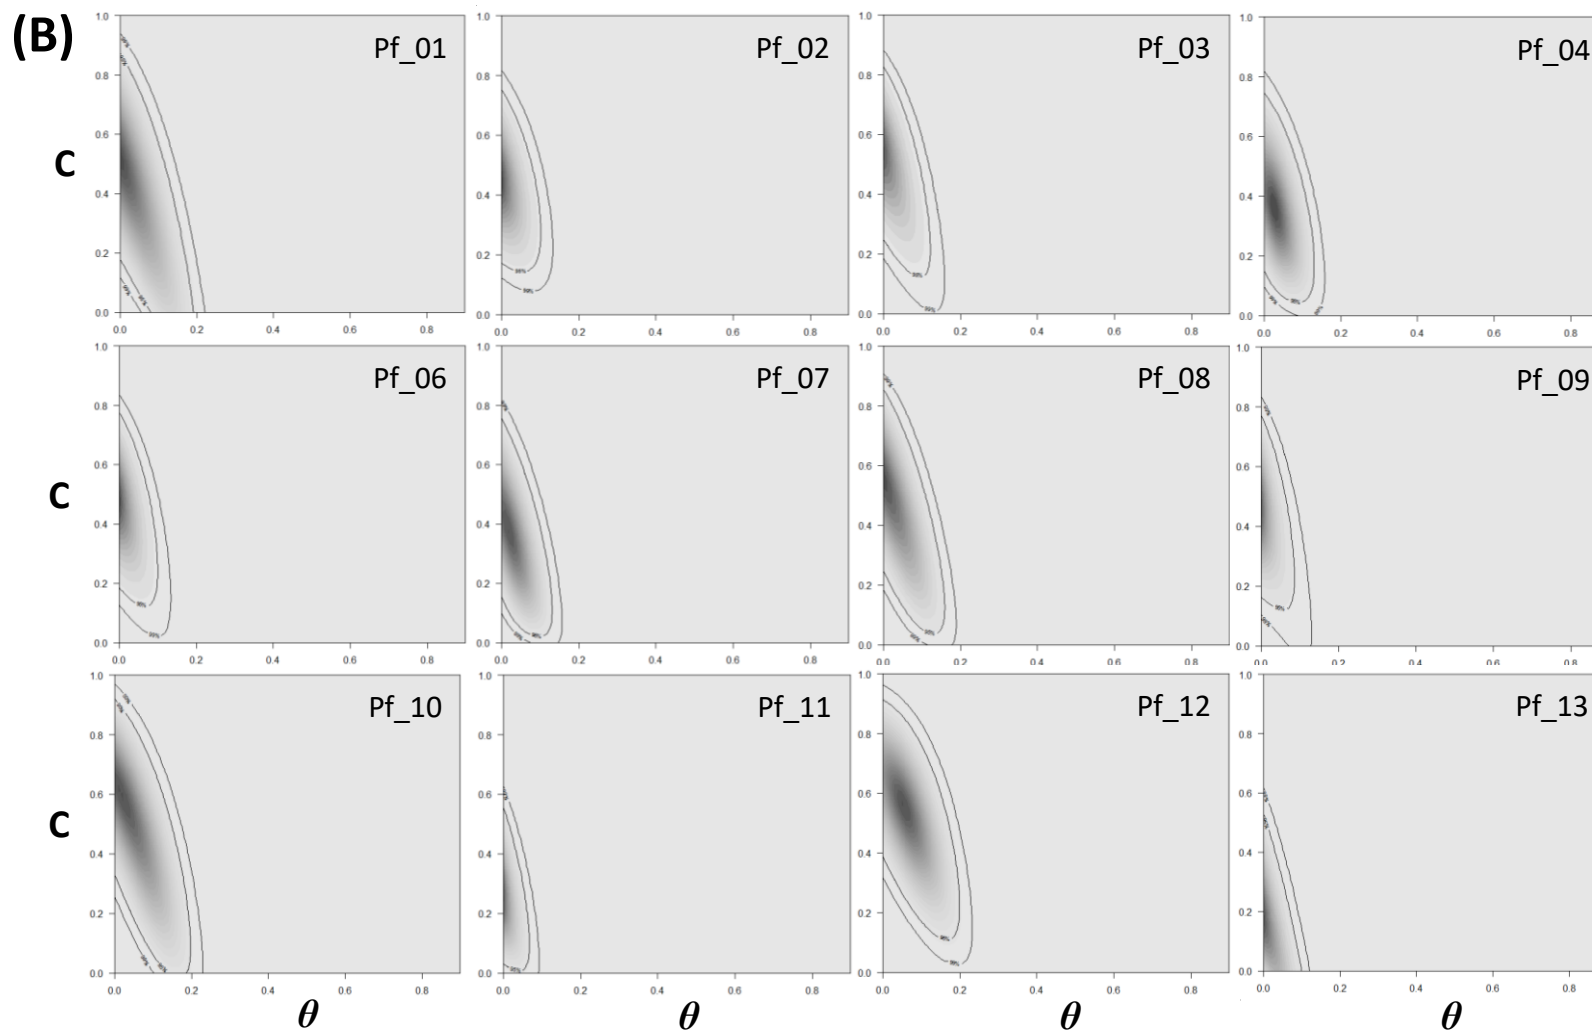



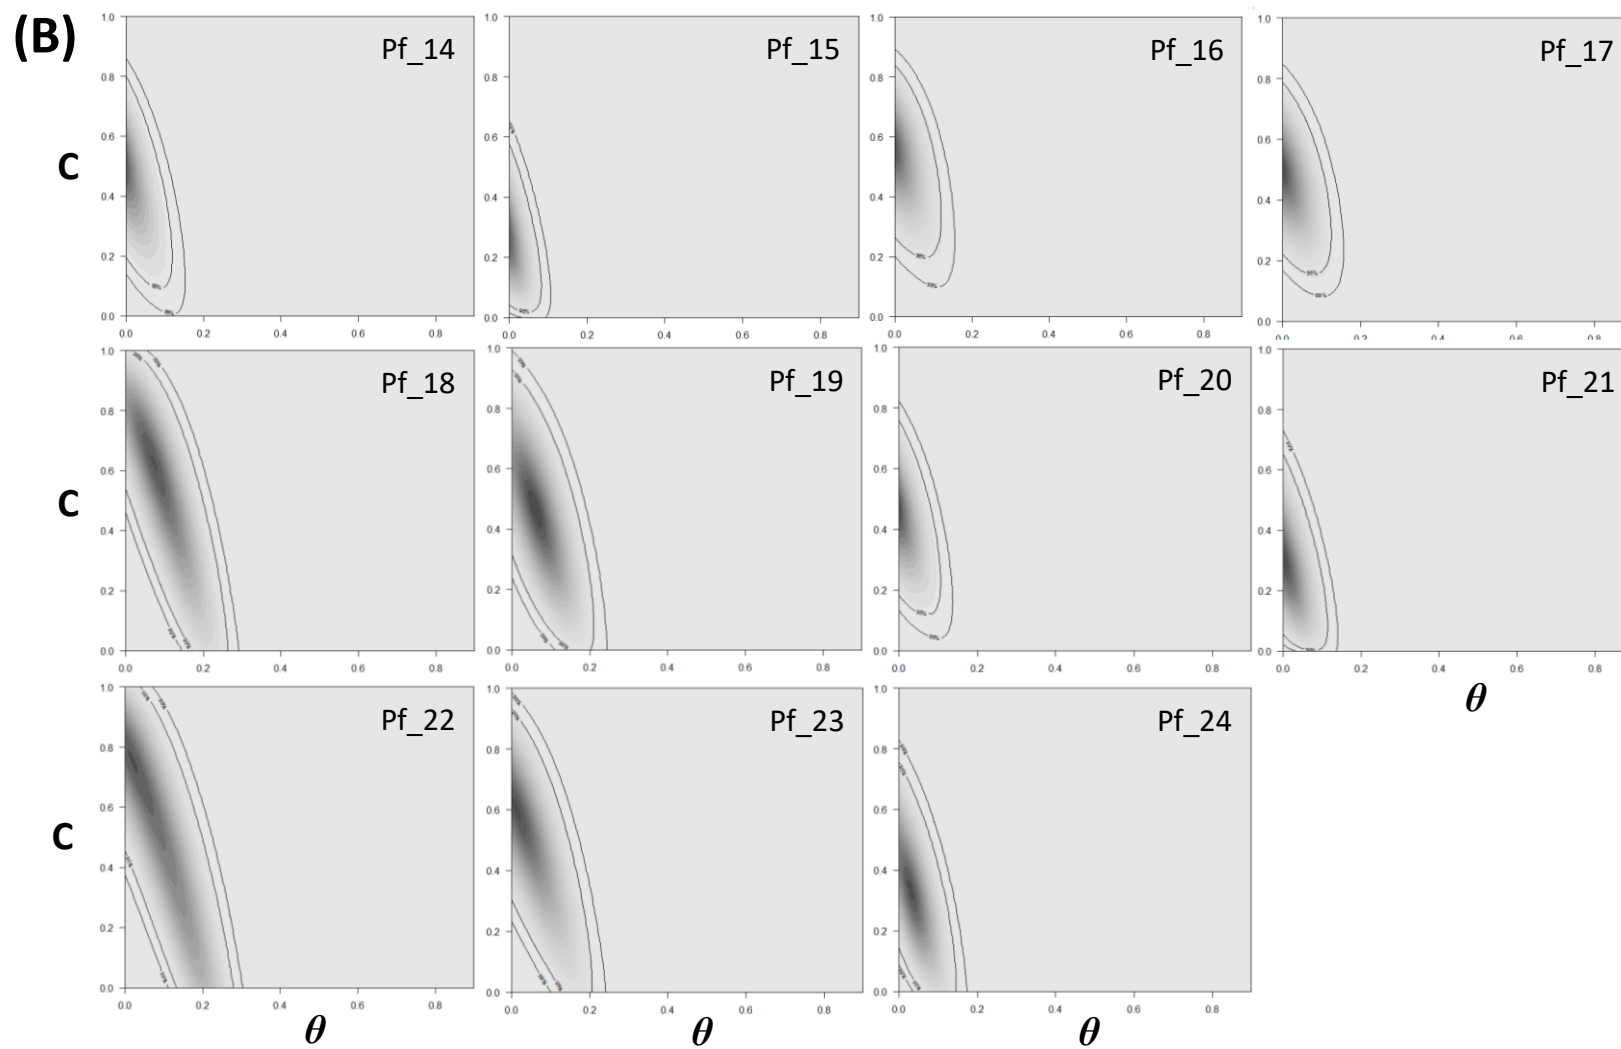

664 **Table S1: Estimation of the variance in family size ( $S^2_k$ ) from the effective population sizes ( $N_e$ ) and proportions of inbred matings (C) estimated**  
 665 **for each final population.** The computation was not possible for Pf\_15 (no  $N_e$  estimate). The estimation was based on Caballero and Hill (1992,  
 666 Eq. 10), with  $\alpha$  computed from C after Ghai (1969, Eq. 17), and  $N = 13,200$ , the census size of initial populations (see Text).

| Final populations | C    | $\alpha$ | $N_e$  | $S^2_k$     |
|-------------------|------|----------|--------|-------------|
| Pf_01             | 0.52 | 0.213    | 44.59  | <b>721</b>  |
| Pf_02             | 0.45 | 0.170    | 59.90  | <b>583</b>  |
| Pf_03             | 0.54 | 0.227    | 41.79  | <b>751</b>  |
| Pf_04             | 0.35 | 0.119    | 30.95  | <b>1257</b> |
| Pf_05             | 0.00 | 0.000    | 24.86  | <b>2122</b> |
| Pf_06             | 0.48 | 0.188    | 40.34  | <b>837</b>  |
| Pf_07             | 0.38 | 0.133    | 112.09 | <b>336</b>  |
| Pf_08             | 0.56 | 0.241    | 136.54 | <b>223</b>  |
| Pf_09             | 0.46 | 0.176    | 94.34  | <b>366</b>  |
| Pf_10             | 0.59 | 0.265    | 193.49 | <b>151</b>  |
| Pf_11             | 0.25 | 0.077    | 86.50  | <b>494</b>  |
| Pf_12             | 0.57 | 0.249    | 227.76 | <b>132</b>  |
| Pf_13             | 0.18 | 0.052    | 136.63 | <b>333</b>  |
| Pf_14             | 0.49 | 0.194    | 34.48  | <b>968</b>  |
| Pf_15             | 0.26 | 0.081    | /      |             |
| Pf_16             | 0.56 | 0.241    | 27.06  | <b>1131</b> |
| Pf_17             | 0.50 | 0.200    | 28.36  | <b>1163</b> |
| Pf_18             | 0.63 | 0.299    | 47.05  | <b>591</b>  |
| Pf_19             | 0.46 | 0.176    | 58.41  | <b>591</b>  |
| Pf_20             | 0.46 | 0.176    | 187.01 | <b>184</b>  |
| Pf_21             | 0.31 | 0.101    | 48.26  | <b>838</b>  |
| Pf_22             | 0.75 | 0.429    | 56.58  | <b>408</b>  |
| Pf_23             | 0.61 | 0.281    | 63.56  | <b>450</b>  |
| Pf_24             | 0.33 | 0.110    | 195.37 | <b>202</b>  |

667

668 **References**

669 **Caballero A, Hill WG. 1992.** Effective size of nonrandom mating populations. *Genetics* **130**: 909–916.

670 **Ghai GL. 1969.** Structure of populations under mixed random and sib mating. *Theoretical and Applied Genetics* **39**: 179–182.
